# Supplementary material for: A glycan-based approach to therapeutic angiogenesis
Source: PLOS journal article supplement (doi:10.1371/journal.pone.0182301), 2017-08-01
Supplement: S5 (10.1371/journal.pone.0182301.s005) [file journal.pone.0182301.s005]

**S5 Table. Statistical analysis of the data presented in Fig 7; Quantified VEGFR1 fluorescence from the cryosections of the xyloside 3 loaded collagen gels, placed on the chick chorioallantoic membrane.**

|                                                                                   |                        |
|-----------------------------------------------------------------------------------|------------------------|
| Fold change relative to control (single group t-test against the mean value of 1) |                        |
| <b>Treatment</b> vs C*                                                            | t(4)=3.2228, p=0.03219 |

For control gels, gels loaded with 1 mM, and 10 mM xyloside **3**, n=3, for 5 mM, n=2.

As the sample size for the 5 mM concentration was too small for statistical analysis, the values for 1 mM and 5 mM was grouped together as xyloside treated group

\* Statistically significant where  $p < 0.05$
